# Supplementary material
Source: PubMed Central journal article supplement (PMC5536196)
Supplement: ahdb-10-202-s1.pdf [file ahdb-10-202-s1.pdf]

**Supplemental Appendix**

**The Clinical and Economic Burden of Hyperkalemia to Medicare and Commercial Payers**

Kathryn Fitch, RN, MEd; J. Michael Woolley, PhD; Tyler Engel, ASA, MAAA; Helen Blumen, MD, MBA

This Appendix has not been edited and is provided as supplemental materials for this article, which was published in *American Health & Drug Benefits* in June 2017.

| <b>National Drug Codes for Sodium Polystyrene Sulfonate</b> |             |             |             |
|-------------------------------------------------------------|-------------|-------------|-------------|
| 00024107501                                                 | 00054380563 | 00904604127 | 46287000601 |
| 00054016550                                                 | 00054881501 | 10702003615 | 46287000604 |
| 00054016551                                                 | 00054881611 | 10702003645 | 46287000660 |
| 00054016555                                                 | 00054881755 | 17856003615 | 46287001216 |
| 00054016563                                                 | 00574200202 | 24987007501 | 49452694501 |
| 00054037950                                                 | 00574200216 | 38779025808 | 49452694502 |
| 00054037951                                                 | 00574200302 | 38779025809 | 49452694503 |
| 00054037955                                                 | 00574200316 | 42806001396 | 51927190100 |
| 00054037963                                                 | 00574200416 | 42808050016 | 54868443900 |

Note: The identification algorithm for sodium polystyrene sulfonate was:

- Generic product identifier (GPI) began with “9945” OR
- GPI began with “9678705070” OR
- Generic name contained “Kayexalate” OR
- Product name contained “polystyrene”

## Identification of Hyperkalemia Patients by Claim Type

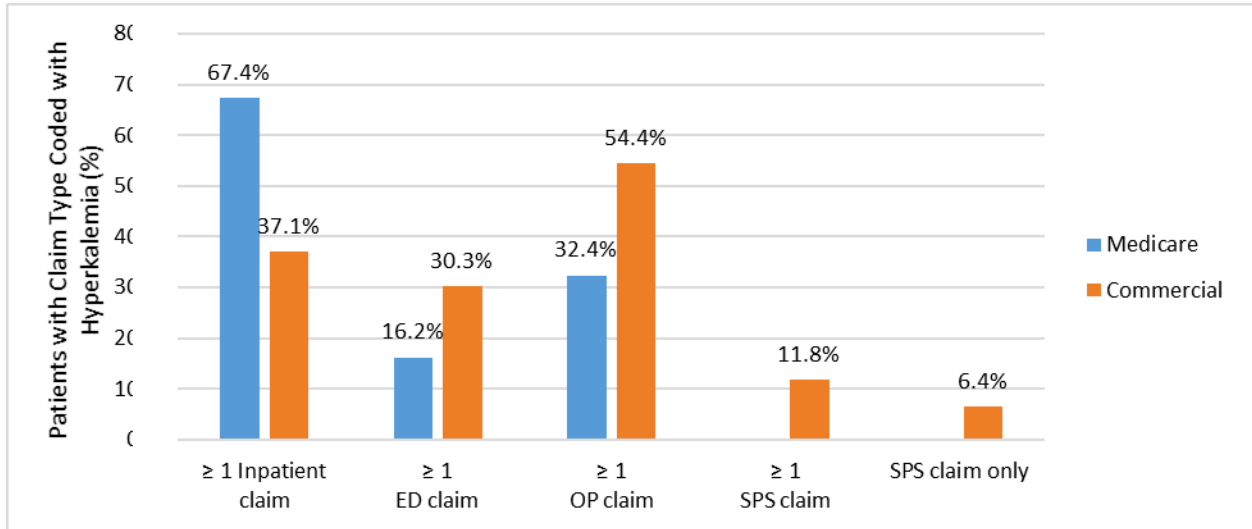

ED = emergency department; OP = outpatient; SPS = sodium polystyrene sulfonate.

Source: Milliman's analysis of 2014 Medicare 5% sample data and MarketScan medical claims data.
